# Supplementary material for: Spatiotemporal patterns and surveillance artifacts in maternal mortality in the United States: a population-based study
Source: PubMed Central journal article supplement — Lancet Reg Health Am. 2024 Oct 4;39:100902. doi: 10.1016/j.lana.2024.100902 (PMC11489048; doi:10.1016/j.lana.2024.100902), 2024-10-04
Supplement: mmc1.pdf [file mmc1.pdf]

## Supplementary Material

### Spatiotemporal patterns and surveillance artifacts in maternal mortality in the United States: A population-based study

#### Table of contents

| Item | Content                                                                                                                                                                                                                                                                                                                                                              | Page |
|------|----------------------------------------------------------------------------------------------------------------------------------------------------------------------------------------------------------------------------------------------------------------------------------------------------------------------------------------------------------------------|------|
| 1.   | Supplementary Table 1. Maternal characteristics in the United States in 1999-2002 and 2018-2021, in states with a low vs high maternal mortality ratios (MMR) in 2018-2021, and in California and Texas in 2018-2021.                                                                                                                                                | 2    |
| 2.   | Supplementary Table 2. Cause-specific maternal mortality ratios (MMR) due to “Pregnancies with abortive outcome”, United States, and specific regions, 1999-2002 and 2018-2021.                                                                                                                                                                                      | 3    |
| 3.   | Supplementary Table 3a. Pearson correlation coefficients and associated P values expressing the relationships between overall and cause-specific maternal mortality ratios (MMRs) in each state in 1999-2002, 2018-2021 and the change between the two periods, United States.                                                                                       | 4    |
| 4.   | Supplementary Table 3b. Pearson correlation coefficients and associated P values expressing the relationships between overall and cause-specific Maternal mortality ratios (MMRs) in each state in 1999-2002, 2018-2021 and the change between the two periods, United States.                                                                                       | 5    |
| 5.   | Supplementary Table 4. Pearson (r) and Spearman ( $\rho$ ) correlation coefficients expressing the relationship between selected overall and cause-specific maternal mortality ratios (MMR), United States, 1999-2002 and 2018-2021.                                                                                                                                 | 6    |
| 6.   | Supplementary Table 5. Number of maternal deaths and maternal mortality ratios (MMR) per 100,000 live births of overall maternal death, deaths due to selected obstetric causes and deaths due to less-specific causes, by race/ethnicity, United States, 1999-2002 and 2018-2021.                                                                                   | 7    |
| 7.   | Supplementary Table 6. Sensitivity analyses showing the change in cause-specific maternal mortality ratios (MMR) including changes in direct obstetric deaths (instead of selected obstetric deaths) and from deaths due to less-specific causes (ICD-10 codes O268 and O998 instead of O268 and O99), United States, and specific regions, 1999-2002 and 2018-2021. | 9    |

Supplementary Table 1. Maternal characteristics in the United States in 1999-2002 and 2018-2021, in states with a low vs high maternal mortality ratio (MMR) in 2018-2021, and in California and Texas in 2018-2021 (NH denotes non-Hispanic; Hypertension and diabetes refer to chronic hypertension and pre-existing diabetes). Low MMR states include 19 states with a maternal mortality ratio of <20 per 100,000 live births in 2018-2021 and high MMR states include 20 states with a maternal mortality ratio  $\geq 26$  per 100,000 live births in 2018-2021.

| Maternal characteristics | United States 1999-2002 |       | United States 2018-2021 |       | Low MMR states 2018-2021 |       | High MMR states 2018-2021 |       | California 2018-2021 |       | Texas 2018-2021 |       |
|--------------------------|-------------------------|-------|-------------------------|-------|--------------------------|-------|---------------------------|-------|----------------------|-------|-----------------|-------|
|                          | Number                  | %     | Number                  | %     | Number                   | %     | Number                    | %     | Number               | %     | Number          | %     |
| All                      | 16,065,890              | 100.0 | 14,817,191              | 100.0 | 5,155,788                | 100.0 | 6,386,379                 | 100.0 | 1,742,266            | 100.0 | 1,498,007       | 100.0 |
| Age: <20 years           | 1,849,146               | 11.5  | 663,726                 | 4.48  | 179,310                  | 3.48  | 360,152                   | 5.64  | 58,856               | 3.27  | 93,974          | 6.27  |
| 20-24                    | 4,043,468               | 25.2  | 2,744,596               | 18.5  | 809,213                  | 15.7  | 1,377,046                 | 21.6  | 257,152              | 14.8  | 322,606         | 21.5  |
| 25-29                    | 4,284,455               | 26.7  | 4,225,979               | 28.5  | 1,417,885                | 27.5  | 1,895,721                 | 29.7  | 447,428              | 25.7  | 435,237         | 29.1  |
| 30-34                    | 3,715,594               | 23.1  | 4,365,017               | 29.5  | 1,640,129                | 31.8  | 1,717,370                 | 26.9  | 546,742              | 31.4  | 399,235         | 26.7  |
| 35-39                    | 1,792,001               | 11.2  | 2,295,622               | 15.5  | 902,470                  | 17.5  | 848,835                   | 13.3  | 343,210              | 19.7  | 201,750         | 13.5  |
| 40-44                    | 361,704                 | 2.25  | 484,435                 | 3.27  | 190,743                  | 3.70  | 175,276                   | 2.74  | 80,635               | 4.63  | 42,277          | 2.82  |
| $\geq 45$                | 19,522                  | 0.12  | 37,816                  | 0.26  | 16,038                   | 0.31  | 11,979                    | 0.19  | 8,243                | 0.47  | 2,928           | 0.20  |
| Race: NH White           | 9,334,152               | 58.1  | 7,603,413               | 51.3  | 2,629,248                | 51.0  | 3,097,025                 | 48.5  | 475,603              | 27.3  | 494,008         | 33.0  |
| NH Black                 | 2,361,579               | 14.7  | 2,147,804               | 14.5  | 467,367                  | 9.06  | 1,231,019                 | 19.3  | 87,391               | 5.02  | 188,484         | 12.6  |
| Hispanic                 | 3,308,700               | 20.6  | 3,525,306               | 23.8  | 1,347,315                | 26.1  | 1,605,118                 | 25.1  | 805,639              | 46.2  | 712,157         | 47.5  |
| AIAN                     | 166,078                 | 1.03  | 110,479                 | 0.75  | 21,081                   | 0.41  | 69,617                    | 1.09  | 5,576                | 0.32  | 2,658           | 0.18  |
| Asian                    | 754,885                 | 4.70  | 912,448                 | 6.16  | 440,747                  | 8.55  | 238,344                   | 3.73  | 250,518              | 14.4  | 78,268          | 5.22  |
| Other                    | 140,496                 | 0.87  | 517,741                 | 3.49  | 250,030                  | 4.85  | 145,256                   | 2.27  | 117,539              | 6.75  | 22,432          | 1.50  |
| Plurality: Single        | 15,556,769              | 96.8  | 14,334,147              | 96.7  | 4,987,505                | 96.7  | 6,179,563                 | 96.8  | 1,689,609            | 97.0  | 1,451,966       | 96.9  |
| Twin                     | 479,603                 | 2.99  | 470,425                 | 3.17  | 164,048                  | 3.18  | 201,348                   | 3.15  | 51,448               | 2.95  | 44,769          | 2.99  |
| Triplet+                 | 29,518                  | 0.18  | 12,619                  | 0.09  | 4,235                    | 0.08  | 5,468                     | 0.09  | 1,209                | 0.07  | 1,272           | 0.08  |
| Hypertension: Yes        | 123,851                 | 0.77  | 352,543                 | 2.38  | 104,269                  | 2.02  | 159,679                   | 2.50  | 23,168               | 1.33  | 24,038          | 1.60  |
| No                       | 15,752,360              | 98.0  | 14,449,214              | 97.5  | 5,046,562                | 97.9  | 6,220,602                 | 97.4  | 1,718,284            | 98.6  | 1,472,481       | 98.3  |
| Unknown                  | 189,679                 | 1.18  | 15,434                  | 0.10  | 4,957                    | 0.10  | 6,098                     | 0.10  | 814                  | 0.05  | 1,488           | 0.10  |
| Diabetes: Yes            | 478,971                 | 2.98  | 1,246,726               | 8.41  | 437,882                  | 8.49  | 489,394                   | 7.66  | 148,048              | 8.50  | 102,789         | 6.86  |
| No                       | 15,397,240              | 95.8  | 13,555,031              | 91.5  | 4,712,949                | 91.4  | 5,890,887                 | 92.2  | 1,593,404            | 91.5  | 1,393,730       | 93.0  |
| Unknown                  | 189,679                 | 1.18  | 15,434                  | 0.10  | 4,957                    | 0.10  | 6,098                     | 0.10  | 814                  | 0.05  | 1,488           | 0.10  |

Supplementary Table 2. Cause-specific maternal mortality ratio (MMR) due to “pregnancies with abortive outcome”\*, United States, and specific regions, 1999-2002 and 2018-2021. MMRs and MMR differences expressed per 100,000 live births.

| Region/<br>Period | Maternal deaths due to pregnancies<br>with abortive outcome |      |                   |                       |
|-------------------|-------------------------------------------------------------|------|-------------------|-----------------------|
|                   | No.                                                         | MMR  | MMR<br>difference | MMR ratio<br>(95% CI) |
| United States     |                                                             |      |                   |                       |
| 1999-02           | 128                                                         | 0·80 | -                 | 1·00 (ref)            |
| 2018-21           | 130                                                         | 0·88 | 0·08              | 1·10<br>(0·86, 1·41)  |
| Low MMR states    |                                                             |      |                   |                       |
| 1999-02           | 33                                                          | 0·55 | -                 | 1·00 (ref)            |
| 2018-21           | 31                                                          | 0·60 | 0·05              | 1·10<br>(0·67, 1·79)  |
| High MMR states   |                                                             |      |                   |                       |
| 1999-02           | 56                                                          | 0·87 | -                 | 1·00 (ref)            |
| 2018-21           | 75                                                          | 1·17 | 0·30              | 1·35<br>(0·96, 1·91)  |
| California        |                                                             |      |                   |                       |
| 1999-02           | 13                                                          | 0·62 | -                 | 1·00 (ref)            |
| 2018-21           | 18                                                          | 1·03 | 0·41              | 1·67<br>(0·82, 3·42)  |
| Texas             |                                                             |      |                   |                       |
| 1999-02           | †                                                           | †    | -                 | 1·00                  |
| 2018-21           | 20                                                          | 1·34 | †                 | †<br>(1·07, 5·50)     |

\* Pregnancies with abortive outcome (International Classification of Diseases codes O00-O07), which includes ectopic pregnancy, hydatidiform mole, other abnormal products of conception, spontaneous abortion, medical abortion, other abortion, unspecified abortion and failed attempted abortion.

† Cells suppressed as cell count <10.

Supplementary Table 3a. Pearson correlation coefficients, 95% confidence intervals (CI) and associated P values expressing the relationships between overall and cause-specific maternal mortality ratios (MMR) in each state in 1999-2002, 2018-2021 and the change in MMRs between the two periods, United States.

| Index                                 | Maternal mortality ratio in 1999-2002 |                                |                           | Maternal mortality ratio in 2018-2021 |                                |                           |             |
|---------------------------------------|---------------------------------------|--------------------------------|---------------------------|---------------------------------------|--------------------------------|---------------------------|-------------|
|                                       | Overall                               | From selected obstetric causes | From less-specific causes | Overall                               | From selected obstetric causes | From less-specific causes |             |
| <b>MMR in 1999-2002</b>               |                                       |                                |                           |                                       |                                |                           |             |
| Overall                               | Correlation (r)                       | 1.00                           | 0.73                      | 0.61                                  | 0.47                           | 0.37                      | 0.23        |
|                                       | 95% CI                                | -                              | 0.57, 0.84                | 0.40, 0.76                            | 0.23, 0.66                     | 0.11, 0.59                | -0.05, 0.47 |
|                                       | P value                               | -                              | <0.0001                   | <0.0001                               | 0.0005                         | 0.006                     | 0.11        |
| From selected obstetric causes        | Correlation (r)                       | 0.73                           | 1.00                      | 0.25                                  | 0.34                           | 0.14                      | 0.22        |
|                                       | 95% CI                                | 0.57, 0.84                     | -                         | -0.03, 0.49                           | 0.08, 0.57                     | -0.14, 0.40               | -0.06, 0.47 |
|                                       | P value                               | <0.0001                        | -                         | 0.08                                  | 0.01                           | 0.34                      | 0.12        |
| From less-specific causes             | Correlation (r)                       | 0.61                           | 0.25                      | 1.00                                  | 0.25                           | 0.30                      | 0.18        |
|                                       | 95% CI                                | 0.40, 0.76                     | -0.03, 0.49               | -                                     | -0.03, 0.49                    | 0.03, 0.53                | -0.10, 0.44 |
|                                       | P value                               | <0.0001                        | 0.08                      | -                                     | 0.08                           | 0.03                      | 0.19        |
| <b>MMR in 2018-2021</b>               |                                       |                                |                           |                                       |                                |                           |             |
| Overall                               | Correlation (r)                       | 0.47                           | 0.37                      | 0.23                                  | 1.00                           | 0.37                      | 0.83        |
|                                       | 95% CI                                | 0.23, 0.66                     | 0.11, 0.59                | -0.05, 0.47                           | -                              | 0.10, 0.58                | 0.72, 0.90  |
|                                       | P value                               | 0.0005                         | 0.006                     | 0.11                                  | -                              | 0.008                     | <0.0001     |
| From selected obstetric causes        | Correlation (r)                       | 0.34                           | 0.14                      | 0.22                                  | 0.37                           | 1.00                      | 0.06        |
|                                       | 95% CI                                | 0.08, 0.57                     | -0.14, 0.40               | -0.06, 0.47                           | 0.10, 0.58                     | -                         | -0.21, 0.33 |
|                                       | P value                               | 0.01                           | 0.34                      | 0.12                                  | 0.008                          | -                         | 0.65        |
| From less-specific causes             | Correlation (r)                       | 0.25                           | 0.30                      | 0.18                                  | 0.83                           | 0.06                      | 1.00        |
|                                       | 95% CI                                | -0.03, 0.49                    | 0.03, 0.53                | -0.10, 0.44                           | 0.72, 0.90                     | -0.21, 0.33               | -           |
|                                       | P value                               | 0.08                           | 0.03                      | 0.19                                  | <0.0001                        | 0.65                      | -           |
| <b>MMR change: 2018-21 vs 1999-02</b> |                                       |                                |                           |                                       |                                |                           |             |
| Overall                               | Correlation (r)                       | -0.05                          | -0.03                     | -0.07                                 | 0.86                           | 0.20                      | 0.81        |
|                                       | 95% CI                                | -0.32, 0.23                    | -0.31, 0.24               | -0.34, 0.21                           | 0.76, 0.92                     | -0.08, 0.45               | 0.69, 0.89  |
|                                       | P value                               | 0.75                           | 0.81                      | 0.62                                  | <0.0001                        | 0.16                      | <0.0001     |
| From selected obstetric causes        | Correlation (r)                       | -0.31                          | -0.70                     | 0.02                                  | -0.01                          | 0.61                      | -0.13       |
|                                       | 95% CI                                | -0.54, -0.04                   | -0.82, -0.52              | -0.26, 0.29                           | -0.28, 0.27                    | 0.41, 0.76                | -0.39, 0.15 |
|                                       | P value                               | 0.02                           | <0.0001                   | 0.89                                  | 0.95                           | <0.0001                   | 0.36        |
| From less-specific causes             | Correlation (r)                       | 0.05                           | 0.15                      | -0.10                                 | 0.77                           | -0.02                     | 0.96        |
|                                       | 95% CI                                | -0.23, 0.32                    | -0.13, 0.41               | -0.37, 0.18                           | 0.63, 0.86                     | -0.29, 0.26               | 0.93-0.97   |
|                                       | P value                               | 0.71                           | 0.28                      | 0.48                                  | <0.0001                        | 0.88                      | <0.0001     |

Supplementary Table 3b. Pearson correlation coefficients, 95% confidence intervals (CI). and associated P values expressing the relationships between overall and cause-specific maternal mortality ratios (MMR) in each state in 1999-2002, 2018-2021 and the change in MMRs between the two periods, United States.

| Index                                 |                 | Maternal mortality ratio in 1999-2002 |                                |                           | Maternal mortality ratio in 2018-2021 |                                |                           |
|---------------------------------------|-----------------|---------------------------------------|--------------------------------|---------------------------|---------------------------------------|--------------------------------|---------------------------|
|                                       |                 | Overall                               | From selected obstetric causes | From less-specific causes | Overall                               | From selected obstetric causes | From less-specific causes |
| <b>MMR in 1999-2002</b>               |                 |                                       |                                |                           |                                       |                                |                           |
| Chronic hypertension                  | Correlation (r) | 0.20                                  | 0.14                           | 0.10                      | -0.07                                 | 0.11                           | -0.11                     |
|                                       | 95% CI          | -0.08, 0.45                           | -0.14, 0.40                    | -0.18, 0.37               | -0.34, 0.31                           | -0.18, 0.37                    | -0.38, 0.17               |
|                                       | P value         | 0.16                                  | 0.32                           | 0.49                      | 0.63                                  | 0.46                           | 0.43                      |
| Malignant neoplasms                   | Correlation (r) | -0.10                                 | -0.01                          | -0.13                     | -0.12                                 | -0.14                          | -0.09                     |
|                                       | 95% CI          | -0.37, 0.18                           | -0.29, 0.27                    | -0.39, 0.15               | -0.39, 0.16                           | -0.40, 0.14                    | -0.36, 0.19               |
|                                       | P value         | 0.48                                  | 0.94                           | 0.38                      | 0.39                                  | 0.31                           | 0.52                      |
| <b>MMR in 2018-2021</b>               |                 |                                       |                                |                           |                                       |                                |                           |
| Chronic hypertension                  | Correlation (r) | 0.42                                  | 0.10                           | 0.07                      | 0.39                                  | 0.20                           | 0.01                      |
|                                       | 95% CI          | 0.16, 0.62                            | -0.18, 0.36                    | -0.21, 0.34               | 0.13, 0.60                            | -0.08, 0.45                    | -0.27, 0.28               |
|                                       | P value         | 0.002                                 | 0.50                           | 0.64                      | 0.004                                 | 0.16                           | 0.97                      |
| Malignant neoplasms                   | Correlation (r) | -0.15                                 | -0.19                          | -0.07                     | 0.15                                  | -0.22                          | 0.33                      |
|                                       | 95% CI          | -0.40, 0.14                           | -0.45, 0.09                    | -0.34, 0.21               | -0.13, 0.41                           | -0.46, 0.06                    | 0.06, 0.55                |
|                                       | P value         | 0.31                                  | 0.17                           | 0.63                      | 0.30                                  | 0.13                           | 0.02                      |
| <b>MMR change: 2018-21 vs 1999-02</b> |                 |                                       |                                |                           |                                       |                                |                           |
| Chronic hypertension                  | Correlation (r) | 0.36                                  | 0.20                           | 0.09                      | 0.13                                  | 0.28                           | -0.24                     |
|                                       | 95% CI          | 0.10, 0.58                            | -0.08, 0.45                    | -0.19, 0.36               | -0.15, 0.39                           | 0.01, 0.52                     | -0.49, 0.04               |
|                                       | P value         | 0.009                                 | 0.15                           | 0.51                      | 0.37                                  | 0.04                           | 0.09                      |
| Malignant neoplasms                   | Correlation (r) | -0.14                                 | -0.19                          | -0.06                     | 0.15                                  | -0.21                          | 0.33                      |
|                                       | 95% CI          | -0.40, 0.14                           | -0.44, 0.09                    | -0.33, 0.21               | -0.13, 0.41                           | -0.46, 0.07                    | 0.06, 0.56                |
|                                       | P value         | 0.33                                  | 0.18                           | 0.65                      | 0.28                                  | 0.14                           | 0.02                      |

Supplementary Table 4. Pearson ( $r$ ) and Spearman correlation coefficients ( $\rho$ ) expressing the relationship between selected overall and cause-specific maternal mortality ratios (MMR), United States, 1999-2002 and 2018-2021.

| Index                                         | Overall<br>MMR<br>2018-2021 | Less-specific<br>causes<br>MMR 2018-21 |
|-----------------------------------------------|-----------------------------|----------------------------------------|
| Overall MMR 1999-2002 ( $r$ )                 | 0.47, P=0.0005              |                                        |
| Overall MMR 1999-2002 ( $\rho$ )              | 0.46, P=0.0008              |                                        |
| Obstetric causes MMR 2018-2021 ( $r$ )        | 0.37, P=0.008               | 0.06, P=0.65                           |
| Obstetric causes MMR 2018-2021 ( $\rho$ )     | 0.42, P=0.002               | 0.13, P=0.36                           |
| Less-specific causes MMR 2018-2021 ( $r$ )    | 0.83, P<0.0001              |                                        |
| Less-specific causes MMR 2018-2021 ( $\rho$ ) | 0.80, P<0.0001              |                                        |
| Change in obstetric causes MMR ( $r$ )        | -0.01, P=0.95               |                                        |
| Change in obstetric causes MMR ( $\rho$ )     | 0.01, P=0.94                |                                        |
| Change in less-specific causes MMR ( $r$ )    | 0.77, P<0.0001              |                                        |
| Change in less-specific causes MMR ( $\rho$ ) | 0.75, P<0.0001              |                                        |

Supplementary Table 5. Number of maternal deaths and maternal mortality ratios (MMRs per 100,000 live births) of overall maternal death, deaths due to selected obstetric causes and deaths due to less specific causes, by race/ethnicity, United States, 1999-2002 and 2018-2021 (MMR difference denotes difference in 2 MMRs per 100,000 live births, MMR ratio refers to the ratio of 2 MMRs, and 95% CI denotes 95% confidence interval).

| Race/<br>ethnicity and<br>Period | All maternal deaths |                |                                   |                                                           | MMR from sel. obstetric causes* |                |                                   |                                                           | MMR from less-specific causes* |                |                                   |                                                        |
|----------------------------------|---------------------|----------------|-----------------------------------|-----------------------------------------------------------|---------------------------------|----------------|-----------------------------------|-----------------------------------------------------------|--------------------------------|----------------|-----------------------------------|--------------------------------------------------------|
|                                  | No.                 | % of<br>deaths | MMR/<br>100,000<br>live<br>births | MMR<br>ratio<br>(95% CI)<br>MMR<br>difference<br>(95% CI) | No.                             | % of<br>deaths | MMR/<br>100,000<br>live<br>births | MMR<br>ratio<br>(95% CI)<br>MMR<br>difference<br>(95% CI) | No.                            | % of<br>deaths | MMR/<br>100,000<br>live<br>births | MMR ratio<br>(95% CI)<br>MMR<br>difference<br>(95% CI) |
| All                              |                     |                |                                   |                                                           |                                 |                |                                   |                                                           |                                |                |                                   |                                                        |
| 1999-2002                        | 1,543               | 100·0          | 9·60                              | 1·00                                                      | 569                             | 47·9           | 3·54                              | 1·00                                                      | 258                            | 16·7           | 1·61                              | 1·00                                                   |
| 2018-2021                        | 3,478               | 100·0          | 23·5                              | 2·44                                                      | 413                             | 11·9           | 2·79                              | 0·79                                                      | 1,665                          | 47·9           | 11·2                              | 7·00                                                   |
|                                  |                     |                | (2·30, 2·60)                      |                                                           |                                 |                | (0·69, 0·89)                      |                                                           |                                |                | (6·14, 7·98)                      |                                                        |
|                                  |                     |                | 13·9 (13·0, 14·8)                 |                                                           |                                 |                | -0·75 (-1·14, 0·36)               |                                                           |                                |                | 9·62 (9·05, 10·2)                 |                                                        |
| Non-Hispanic White               |                     |                |                                   |                                                           |                                 |                |                                   |                                                           |                                |                |                                   |                                                        |
| 1999-2002                        | 588                 | 100·0          | 6·30                              | 1·00                                                      | 212                             | 36·1           | 2·27                              | 1·00                                                      | 121                            | 20·6           | 1·30                              | 1·00                                                   |
| 2018-2021                        | 1,489               | 100·0          | 19·6                              | 3·11                                                      | 175                             | 11·8           | 2·30                              | 1·01†                                                     | 768                            | 51·6           | 10·1                              | 7·79†                                                  |
|                                  |                     |                | (2·83, 3·42)                      |                                                           |                                 |                | (0·83, 1·24)                      |                                                           |                                |                | (6·43, 9·44)                      |                                                        |
|                                  |                     |                | 13·3 (12·2, 14·4)                 |                                                           |                                 |                | 0·03 (-0·43, 0·49)                |                                                           |                                |                | 8·80 (8·05, 9·55)                 |                                                        |
| Non-Hispanic Black               |                     |                |                                   |                                                           |                                 |                |                                   |                                                           |                                |                |                                   |                                                        |
| 1999-2002                        | 575                 | 100·0          | 24·3                              | 1·00                                                      | 185                             | 32·2           | 7·83                              | 1·00                                                      | 93                             | 16·2           | 3·94                              | 1·00                                                   |
| 2018-2021                        | 1,102               | 100·0          | 51·3                              | 2·11                                                      | 115                             | 10·4           | 5·35                              | 0·68†                                                     | 51646                          | 46·8           | 24·0                              | 6·10†                                                  |
|                                  |                     |                | (1·91, 2·33)                      |                                                           |                                 |                | (0·54, 0·86)                      |                                                           |                                |                | (4·89, 7·61)                      |                                                        |
|                                  |                     |                | 27·0 (23·3, 30·6)                 |                                                           |                                 |                | -2·48 (-3·97, -0·98)              |                                                           |                                |                | 20·1 (17·9, 22·3)                 |                                                        |
| Hispanic                         |                     |                |                                   |                                                           |                                 |                |                                   |                                                           |                                |                |                                   |                                                        |
| 1999-2002                        | 291                 | 100·0          | 8·79                              | 1·00                                                      | 134                             | 46·0           | 4·05                              | 1·00                                                      | 34                             | 11·7           | 1·03                              | 1·00                                                   |
| 2018-2021                        | 623                 | 100·0          | 17·7                              | 2·01                                                      | 77                              | 12·4           | 2·18                              | 0·54                                                      | 275                            | 44·1           | 7·80                              | 7·59                                                   |
|                                  |                     |                | (1·75, 2·31)                      |                                                           |                                 |                | (0·41, 0·71)                      |                                                           |                                |                | (5·32, 10·8)                      |                                                        |
|                                  |                     |                | 8·86 (7·15, 10·6)                 |                                                           |                                 |                | -1·86 (-2·71, -1·02)              |                                                           |                                |                | 6·77 (5·78, 7·75)                 |                                                        |
| Other                            |                     |                |                                   |                                                           |                                 |                |                                   |                                                           |                                |                |                                   |                                                        |
| 1999-2002                        | 89                  | 100·0          | 8·38                              | 1·00                                                      | 38                              | 42·7           | 3·58                              | 1·00                                                      | 10                             | 11·2           | 0·94                              | 1·00                                                   |
| 2018-2021                        | 264                 | 100·0          | 17·1                              | 2·04                                                      | 46                              | 17·4           | 2·99                              | 0·83                                                      | 106                            | 40·2           | 6·88                              | 7·30                                                   |
|                                  |                     |                | (1·61, 2·61)                      |                                                           |                                 |                | (0·54, 1·28)                      |                                                           |                                |                | (3·82, 14·0)                      |                                                        |
|                                  |                     |                | 8·75 (6·03, 11·5)                 |                                                           |                                 |                | -0·59 (-2·02, 0·83)               |                                                           |                                |                | 5·93 (4·50, 7·37)                 |                                                        |

\*Deaths from less-specific causes included deaths due to the following underlying causes: “Other specified pregnancy-related conditions” (ICD-10 code O26.8) and “Other maternal diseases classifiable elsewhere” (O99). Deaths from selected obstetric causes included deaths due to the following underlying causes: pre-eclampsia (O11, O14), gestational hypertension (O13), eclampsia (O15), placental disorders (O43), placenta previa (O44), placental abruption (O45), antepartum hemorrhage, not elsewhere classified (O46), obstructed labor (O64, O65, O66), uterine rupture and other obstetric trauma (O71), postpartum hemorrhage (O72), retained placenta (O73), puerperal sepsis (O85), other puerperal infections (O86) and amniotic fluid embolism (O881).

† Test for homogeneity of the MMR ratio between non-Hispanic White and non-Hispanic Black women for MMR from selected obstetric causes: P value 0.01; and from less-specific causes: P value 0.10. Period-specific patterns of maternal death due to chronic hypertension and maternal death associated with malignant neoplasms were not assessed by race/ethnicity due to the small numbers of such cases in most race/ethnicity groups.



Supplementary Table 6. Sensitivity analyses showing the change in cause-specific maternal mortality ratios (MMR) including changes in direct obstetric deaths (instead of selected obstetric deaths) and from deaths due to less-specific causes (ICD-10 codes O268 and O998 instead of O268 and O99), United States, and specific regions, 1999-2002 and 2018-2021.

| Region/<br>Period | Cause-specific maternal mortality |                                   |                   |                       |                      |                                   |                   |                       |
|-------------------|-----------------------------------|-----------------------------------|-------------------|-----------------------|----------------------|-----------------------------------|-------------------|-----------------------|
|                   | Direct maternal deaths            |                                   |                   |                       | Less-specific causes |                                   |                   |                       |
|                   | No.                               | MMR/<br>100,000<br>live<br>births | MMR<br>difference | MMR ratio<br>(95% CI) | No.                  | MMR/<br>100,000<br>live<br>births | MMR<br>difference | MMR ratio<br>(95% CI) |
| United States     |                                   |                                   |                   |                       |                      |                                   |                   |                       |
| 1999-02           | 1,125                             | 7.00                              | -                 | 1.00 (ref)            | 75                   | 0.47                              | -                 | 1.00 (ref)            |
| 2018-21           | 1,002                             | 6.76                              | -0.24             | 0.97<br>(0.89, 1.05)  | 1,083                | 7.31                              | 6.84              | 15.7<br>(12.4, 18.8)  |
| Low MMR states    |                                   |                                   |                   |                       |                      |                                   |                   |                       |
| 1999-02           | 364                               | 6.03                              | -                 | 1.00 (ref)            | 19                   | 0.31                              | -                 | 1.00 (ref)            |
| 2018-21           | 279                               | 5.41                              | -0.62             | 0.90<br>(0.77, 1.05)  | 204                  | 3.96                              | 3.64              | 12.6<br>(7.85, 20.1)  |
| High MMR states   |                                   |                                   |                   |                       |                      |                                   |                   |                       |
| 1999-02           | 499                               | 7.74                              | -                 | 1.00 (ref)            | 45                   | 0.70                              | -                 | 1.00 (ref)            |
| 2018-21           | 493                               | 7.72                              | -0.02             | 1.00<br>(0.88, 1.13)  | 625                  | 9.79                              | 9.09              | 14.0<br>(10.4, 19.0)  |
| California        |                                   |                                   |                   |                       |                      |                                   |                   |                       |
| 1999-02           | 151                               | 7.16                              | -                 | 1.00 (ref)            | *                    | *                                 | *                 | 1.00 (ref)            |
| 2018-21           | 110                               | 6.31                              | -0.85             | 0.88<br>(0.69, 1.13)  | 31                   | 1.78                              | *                 | *<br>(2.92, 19.3)     |
| Texas             |                                   |                                   |                   |                       |                      |                                   |                   |                       |
| 1999-02           | 91                                | 6.27                              | -                 | 1.00                  | 10                   | 0.69                              | -                 | 1.00 (ref)            |
| 2018-21           | 89                                | 5.94                              | -0.33             | 0.95<br>(0.71, 1.27)  | 133                  | 8.88                              | 1.54              | 12.9<br>(6.77, 24.5)  |

\*Cells suppressed as cell count <10.
